# Supplementary material
Source: MDPI journal article supplement (https://www.mdpi.com/2673-7256/2/1/10)
Supplement: s1 [file s1]

## Supplementary Materials

# Photoreactions of $\text{Sc}_3\text{N}@\text{C}_{80}$ with Disilirane, Silirane, and Digermirane: A Photochemical Method to Separate $I_h$ and $D_{5h}$ Isomers

Masahiro Kako,\* Kyosuke Miyabe, Shinpei Fukazawa, Shinji Kanzawa, Masanori Yasui, Michio Yamada,  
Yutaka Maeda, Zdeněk Slanina,\* Filip Uhlík, Ludwik Adamowicz, Ilias Papadopoulos, Dirk M. Guldi,\*  
Makoto Furukawa, Shigeru Nagase,\* Takeshi Akasaka\*

### Table of Contents

|                                                                                                                                             |      |
|---------------------------------------------------------------------------------------------------------------------------------------------|------|
| <b>Materials and General Methods and Complete list of authors for Ref 51.</b>                                                               | S-2  |
| <b>Figure S1.</b> HPLC profiles of the photoreaction of $\text{Sc}_3\text{N}@D_{5h}\text{-C}_{80}$ with <b>1</b> .                          | S-3  |
| <b>Figure S2.</b> HPLC profiles of the thermolysis of the mixture of <b>2</b> and <b>3</b> .                                                | S-3  |
| <b>Figure S3.</b> HPLC profiles of the photoreaction of $\text{Sc}_3\text{N}@D_{5h}\text{-C}_{80}$ with <b>4</b> .                          | S-3  |
| <b>Figure S4.</b> HPLC profiles of the thermolysis of the mixture of <b>5a</b> , <b>5b</b> , and <b>6</b> .                                 | S-4  |
| <b>Figure S5.</b> HPLC profile of the reaction mixture of $\text{Sc}_3\text{N}@I_h\text{-C}_{80}$ and <b>7</b> .                            | S-4  |
| <b>Figure S6.</b> HPLC profiles of the photolysis of $\text{Sc}_3\text{N}@D_{5h}\text{-C}_{80}$ with <b>7</b> .                             | S-5  |
| <b>Figure S7.</b> HPLC profiles of the thermolysis of <b>9</b> .                                                                            | S-5  |
| <b>Figure S8.</b> 500 MHz $^1\text{H}$ NMR spectrum of <b>9</b> recorded at 293 K in $\text{CS}_2/\text{CDCl}_3$ (1:3).                     | S-5  |
| <b>Figure S9.</b> 125 MHz $^{13}\text{C}$ NMR spectra of <b>9</b> recorded at 293 K in $\text{CS}_2/\text{CDCl}_3$ (1:3).                   | S-6  |
| <b>Figure S10.</b> 500 MHz VT $^1\text{H}$ NMR spectra of <b>9</b> recorded in toluene- $d_8$ .                                             | S-7  |
| <b>Figure S11.</b> Disorder of $\text{C}_{80}$ cage and $\text{Sc}_3\text{N}$ cluster with occupancies in the crystal of <b>9</b> .         | S-8  |
| <b>Figure S12.</b> Raw data of all the transient absorption measurements of $\text{Sc}_3\text{N}@I_h\text{-C}_{80}$ .                       | S-9  |
| <b>Figure S13.</b> Residual measurements of $\text{Sc}_3\text{N}@I_h\text{-C}_{80}$ in the absence and the presence of <b>7</b> .           | S-9  |
| <b>Figure S14.</b> Raw data of all the transient absorption measurements of $\text{Sc}_3\text{N}@D_{5h}\text{-C}_{80}$ .                    | S-10 |
| <b>Figure S15.</b> Residual measurements of $\text{Sc}_3\text{N}@D_{5h}\text{-C}_{80}$ in the absence and the presence of <b>7</b> .        | S-10 |
| <b>Figure S16.</b> UV-Visible Spectra of $\text{Sc}_3\text{N}@I_h\text{-C}_{80}$ and $\text{Sc}_3\text{N}@D_{5h}\text{-C}_{80}$ in toluene. | S-11 |
| <b>Figure S17.</b> Pure toluene reference measurements.                                                                                     | S-12 |
| <b>Table S1.</b> Ten lowest excited states of $\text{Sc}_3\text{N}@I_h\text{-C}_{80}$ calculated by TD-B3LYP/6-31G*~SDD.                    | S-13 |
| <b>Figure S18.</b> Selected molecular orbitals of $\text{Sc}_3\text{N}@I_h\text{-C}_{80}$ .                                                 | S-13 |
| <b>Table S2.</b> Ten lowest excited states of $\text{Sc}_3\text{N}@D_{5h}\text{-C}_{80}$ calculated by TD-B3LYP/6-31G*~SDD.                 | S-14 |
| <b>Figure S19.</b> Selected molecular orbitals of $\text{Sc}_3\text{N}@D_{5h}\text{-C}_{80}$ .                                              | S-14 |
| <b>Table S3.</b> Cartesian coordinates of optimized structures.                                                                             | S-15 |

**Materials and General Methods:** All chemicals were reagent grade, purchased from Wako Pure Chemical Industries Ltd.  $\text{Sc}_3\text{N@C}_{80}$  was purchased from Luna Innovations Inc. 1,2-dichlorobenzene (ODCB) was distilled from  $\text{P}_2\text{O}_5$  under vacuum before use. Toluene was distilled from benzophenone sodium ketyl under dry  $\text{N}_2$  prior to use. Reagents were used as purchased unless otherwise specified. High-performance liquid chromatography (HPLC) was performed on an LC-908 apparatus (Japan Analytical Industry Co. Ltd.) monitored using a UV3702 detector. Analytical HPLC was performed on a PU-1586 pump with a UV-1575 detector (JASCO Corp.). Buckyprep-M (i.d. 10 mm  $\times$  250 mm, 4.6 mm  $\times$  250 mm), 5PBB (i.d. 4.6 mm  $\times$  250 mm), and 5PYE (i.d. 4.6 mm  $\times$  250 mm) columns (Nacalai Tesque Inc.) were used for HPLC separation. Toluene was used as the eluent for HPLC. The  $^1\text{H}$  and  $^{13}\text{C}$  NMR measurements were conducted on a JEOL ECA-500 spectrometer (JEOL Ltd.). MALDI-TOF mass experiments were performed (Autoflex III smartbeam, Bruker Daltonics) with 1,1,4,4-tetraphenyl-1,3-butadiene (TPB) as the matrix in both positive and negative ion modes. Absorption spectra were measured using a UV spectrophotometer (UV-3150, Shimadzu Corp.). Cyclic voltammograms and differential pulse voltammograms were recorded on an electrochemical analyzer (BAS CV50W, BAS Inc.). The reference electrode was a saturated calomel reference electrode (SCE). The glassy carbon electrode was used as the working electrode, and a platinum wire was used as the counter electrode. All potentials are referenced to the ferrocene/ferrocenium couple ( $\text{Fc}/\text{Fc}^+$ ) as the standard.  $(n\text{-Bu})_4\text{NPF}_6$  (0.1 M) in ODCB was used as the supporting electrolyte solution. The cyclic voltammograms were recorded using a scan rate of 20 mV/s. The differential pulse voltammograms were obtained using a pulse amplitude of 50 mV, a pulse width of 50 ms, a pulse period of 200 ms, and a scan rate of 50 mV/s.

#### **Complete list of authors for Ref 51.**

Frisch, M. J.; Trucks, G. W.; Schlegel, H. B.; Scuseria, G. E.; Robb, M. A.; Cheeseman, J. R.; Scalmani, G.; Barone, V.; Mennucci, B.; Petersson, G. A.; Nakatsuji, H.; Caricato, M.; Li, X.; Hratchian, H. P.; Izmaylov, A. F.; Bloino, J.; Zheng, G.; Sonnenberg, J. L.; Hada, M.; Ehara, M.; Toyota, K.; Fukuda, R.; Hasegawa, J.; Ishida, M.; Nakajima, T.; Honda, Y.; Kitao, O.; Nakai, H.; Vreven, T.; Montgomery, Jr., J. A.; Peralta, J. E.; Ogliaro, F.; Bearpark, M.; Heyd, J. J.; Brothers, E.; Kudin, K. N.; Staroverov, V. N.; Kobayashi, R.; Normand, J.; Raghavachari, K.; Rendell, A.; Burant, J. C.; Iyengar, S. S.; Tomasi, J.; Cossi, M.; Rega, N.; Millam, N. J.; Klene, M.; Knox, J. E.; Cross, J. B.; Bakken, V.; Adamo, C.; Jaramillo, J.; Gomperts, R.; Stratmann, R. E.; Yazyev, O.; Austin, A. J.; Cammi, R.; Pomelli, C.; Ochterski, J. W.; Martin, R. L.; Morokuma, K.; Zakrzewski, V. G.; Voth, G. A.; Salvador, P.; Dannenberg, J. J.; Dapprich, S.; Daniels, A. D.; Farkas, Ö.; Foresman, J. B.; Ortiz, J. V.; Cioslowski, J.; Fox, D. J. Gaussian 09, Rev. C.01. Gaussian Inc.: Wallingford, CT, 2013.

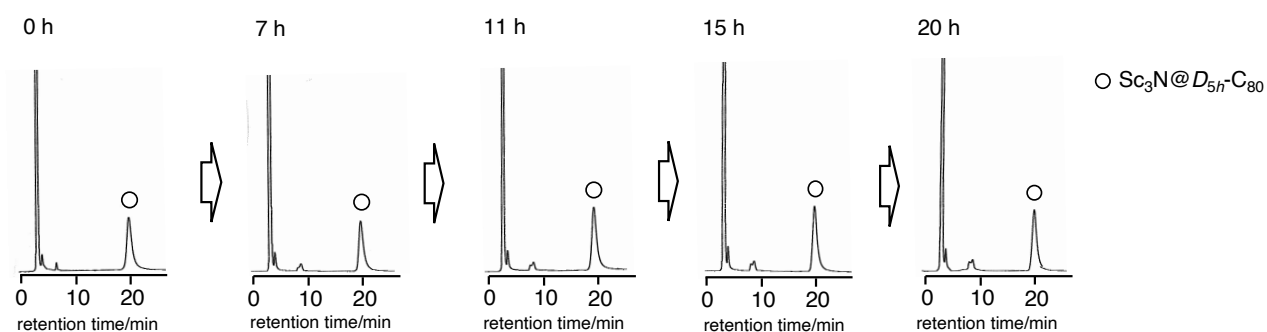

**Figure S1.** HPLC profiles of the photoreaction of  $\text{Sc}_3\text{N}@D_{5h}\text{-C}_{80}$  with **1**. HPLC conditions: Buckyprep-M column ( $\phi$  4.6 x 250 mm), Eluent: toluene, Flow rate: 1.0 ml/min, Detection wavelength: 330 nm.

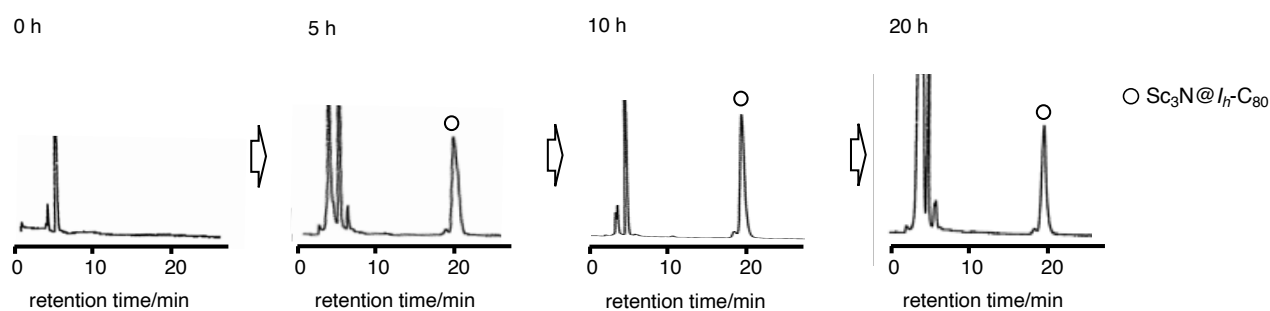

**Figure S2.** HPLC profiles of the thermolysis of the mixture of **2** and **3**. HPLC conditions: 5PYE column ( $\phi$  4.6 x 250 mm), Eluent: toluene, Flow rate: 1.0 ml/min, Detection wavelength: 330 nm.

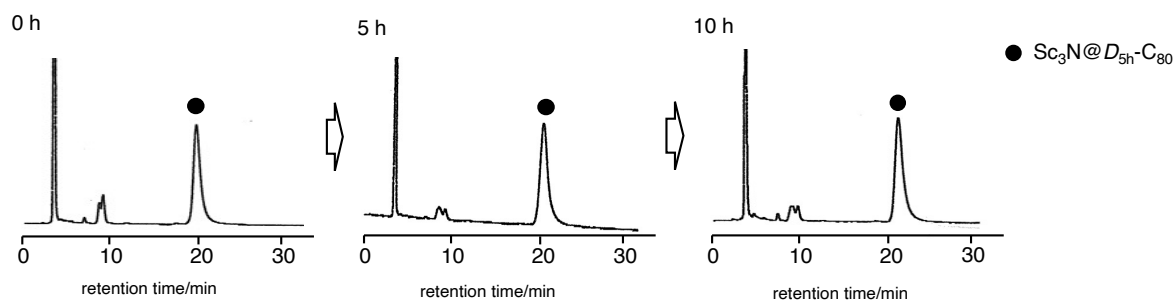

**Figure S3.** HPLC profiles of the photoreaction of  $\text{Sc}_3\text{N}@D_{5h}\text{-C}_{80}$  with **4**. HPLC conditions: Buckyprep-M column ( $\phi$  4.6 x 250 mm), Eluent: toluene, Flow rate: 1.0 ml/min, Detection wavelength: 330 nm.

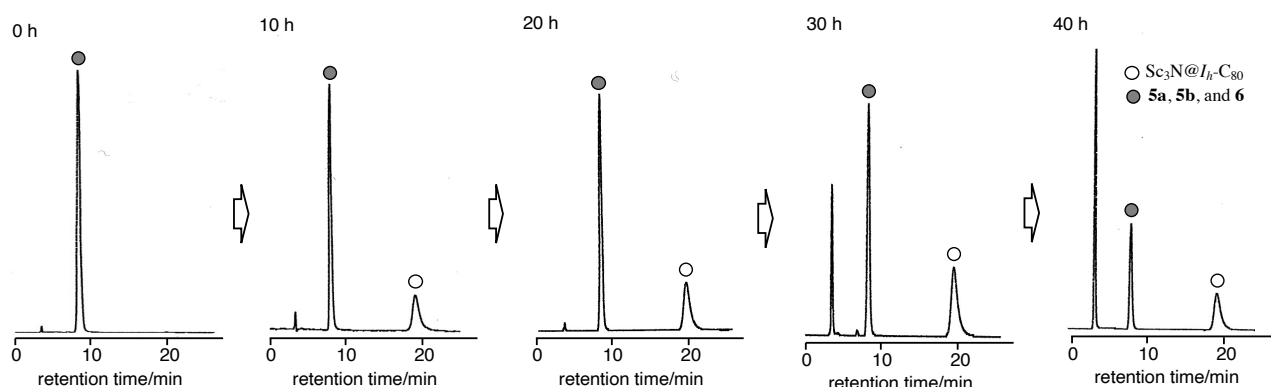

**Figure S4.** HPLC profiles of the thermolysis of the mixture of **5a**, **5b**, and **6**. HPLC conditions: 5PYE column ( $\phi$  4.6 x 250 mm), Eluent: toluene, Flow rate: 1.0 ml/min, Detection wavelength: 330 nm.

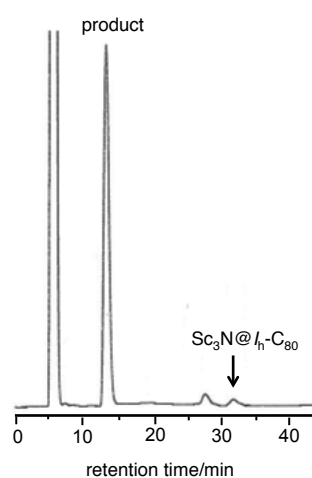

**Figure S5.** HPLC profile of the reaction mixture of  $\text{Sc}_3\text{N}@I_h\text{-C}_{80}$  and **7**. Conditions: Buckyrep-M ( $\phi$ 10 × 250 mm); Eluent, toluene; Flow rate, 3.0 mL/min; Detection wavelength, 330 nm.

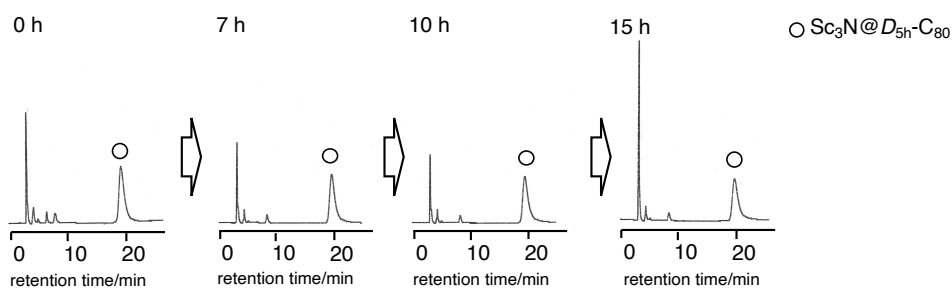

**Figure S6.** HPLC profiles of the photolysis of  $\text{Sc}_3\text{N}@D_{5h}\text{-C}_{80}$  with **7**. HPLC conditions: Buckyprep-M column ( $\phi 4.6 \times 250$  mm), Eluent: toluene, Flow rate: 1.0 ml/min, Detection wavelength: 330 nm.

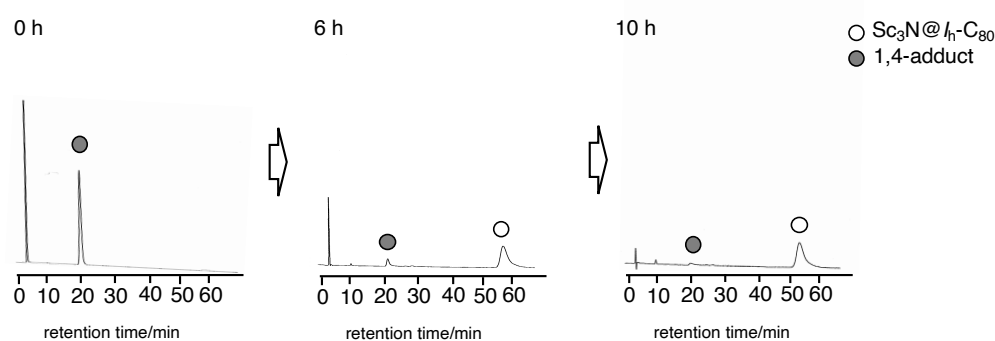

**Figure S7.** HPLC profiles of the thermolysis of **9**. HPLC conditions: 5PBB column ( $\phi 4.6 \times 250$  mm), Eluent: toluene, Flow rate: 1.0 ml/min, Detection wavelength: 330 nm.

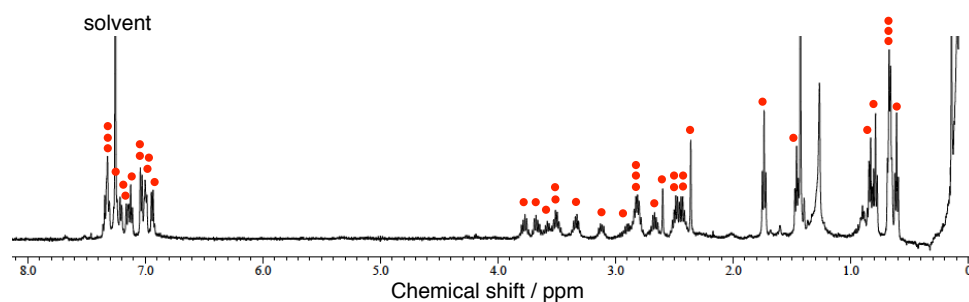

**Figure S8.** 500 MHz  $^1\text{H}$  NMR spectrum of **9** recorded at 293 K in  $\text{CS}_2/\text{CDCl}_3$  (1:3).

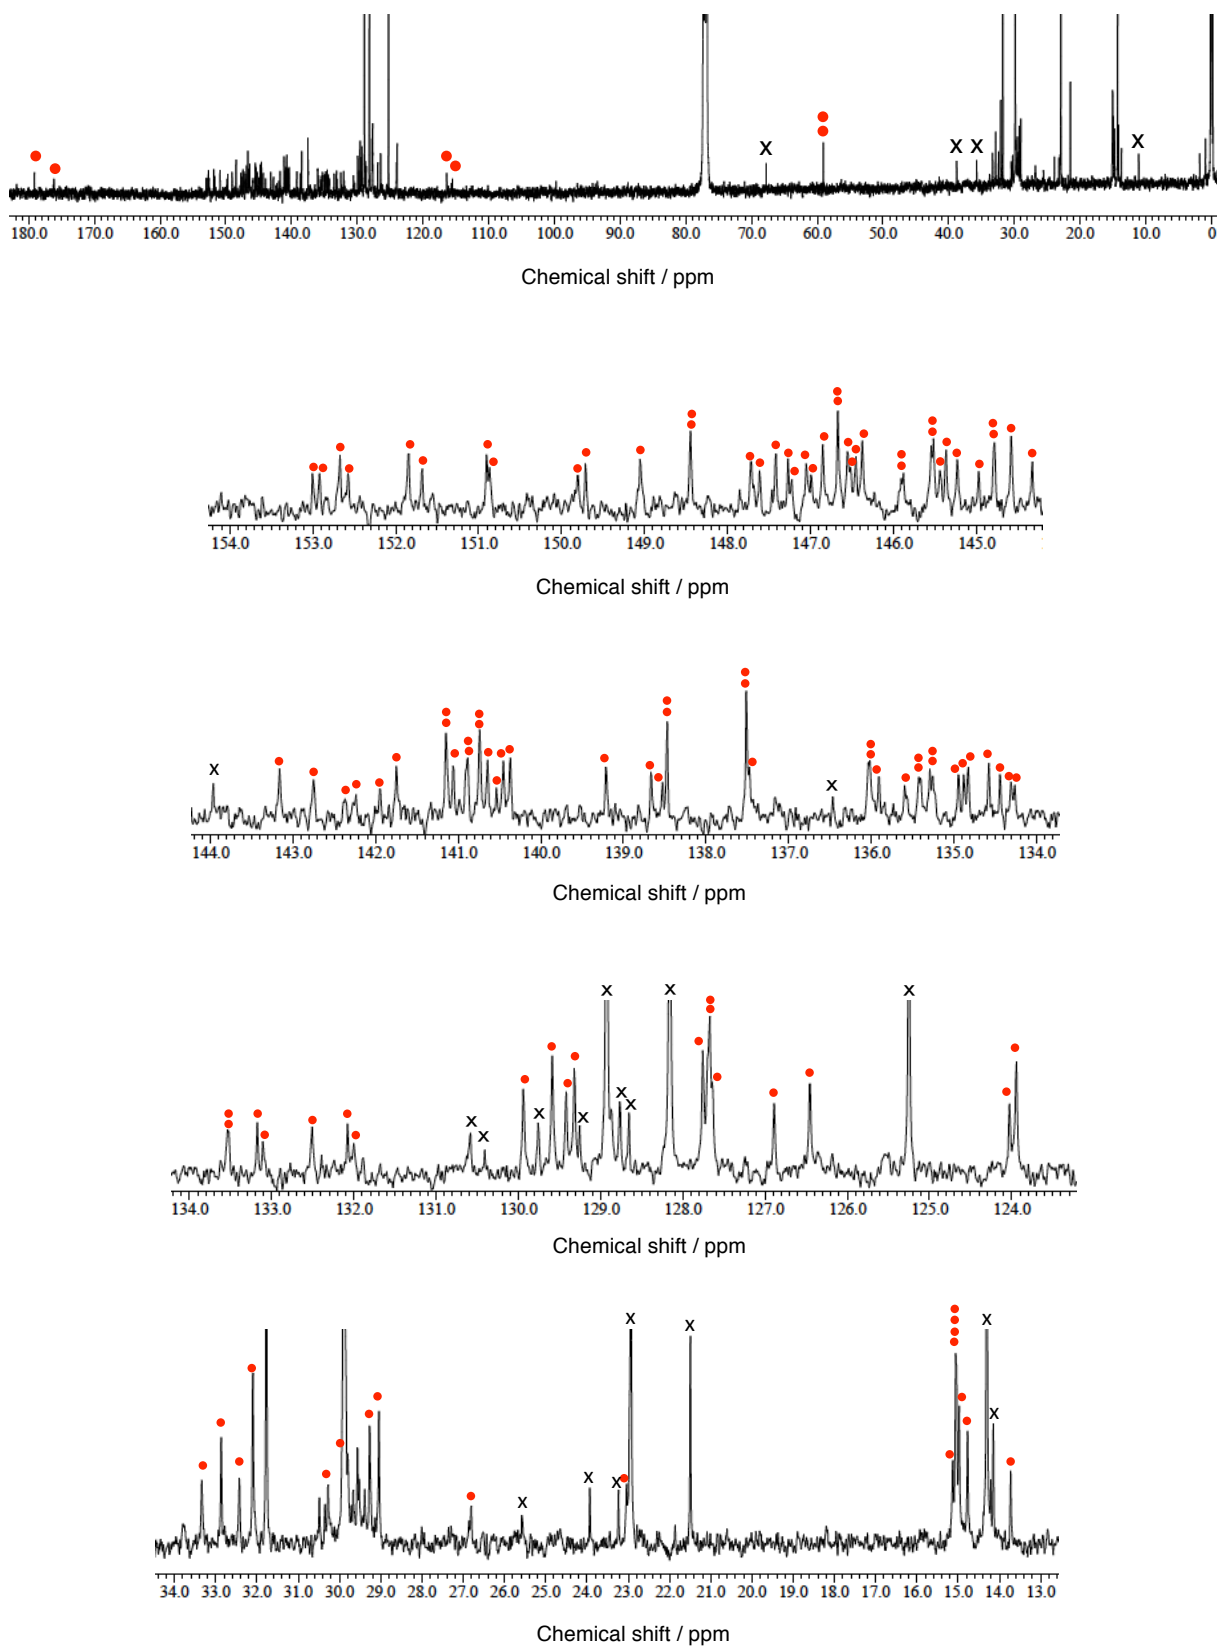

**Figure S9.** 125 MHz  $^{13}\text{C}$  NMR spectra of **9** recorded at 293 K in  $\text{CS}_2/\text{CDCl}_3$  (1:3).

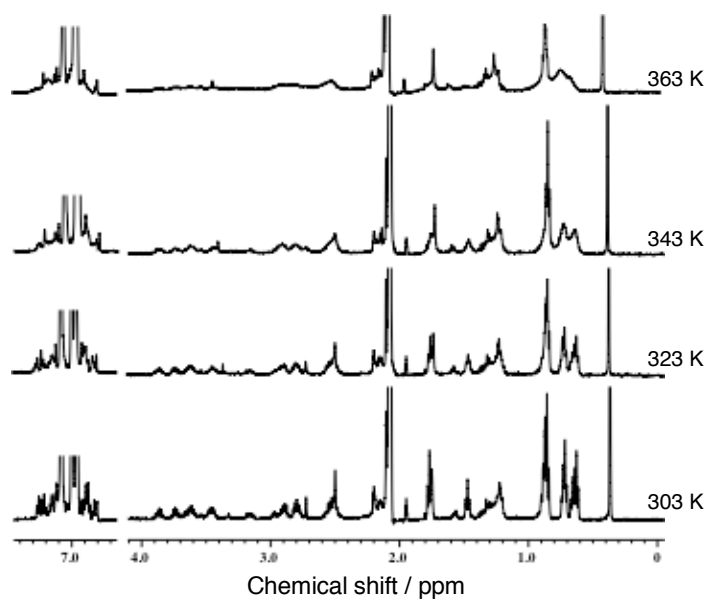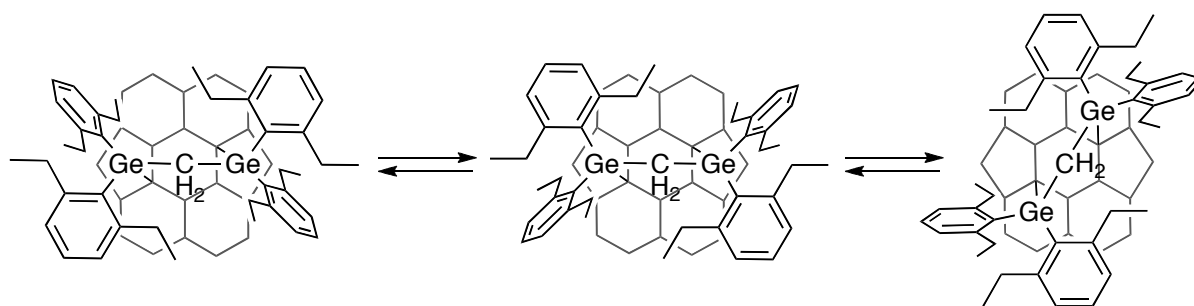

**Figure S10.** 500 MHz VT  $^1\text{H}$  NMR spectra of **9** recorded in toluene- $d_8$  (above). Possible isomerization between conformers (below).

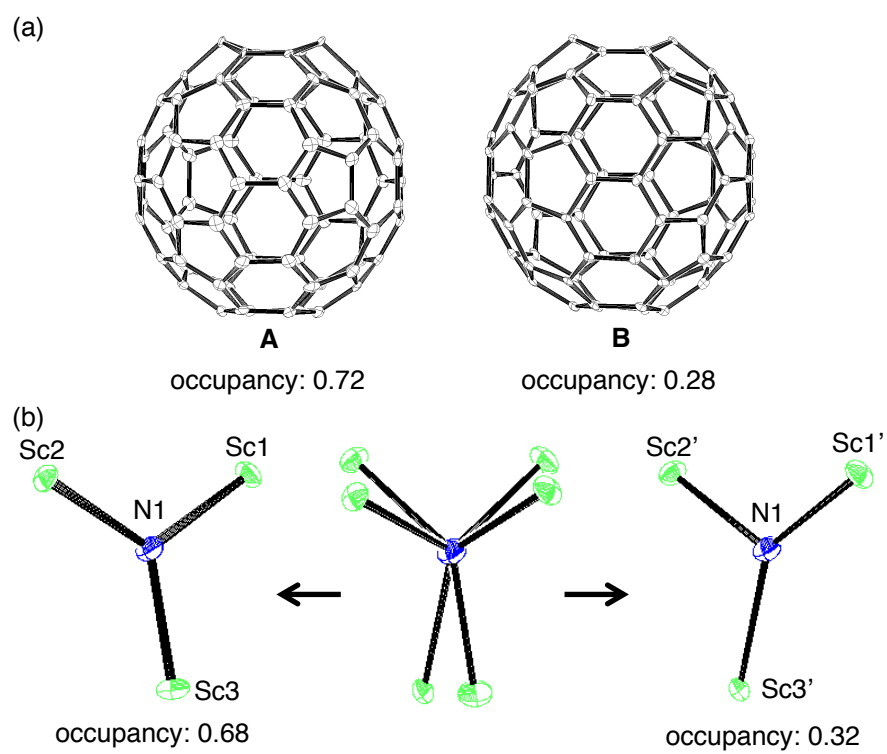

**Figure S11.** Disorder of (a)  $C_{80}$  cage and (b)  $Sc_3N$  cluster with occupancies in the crystal of **9**.



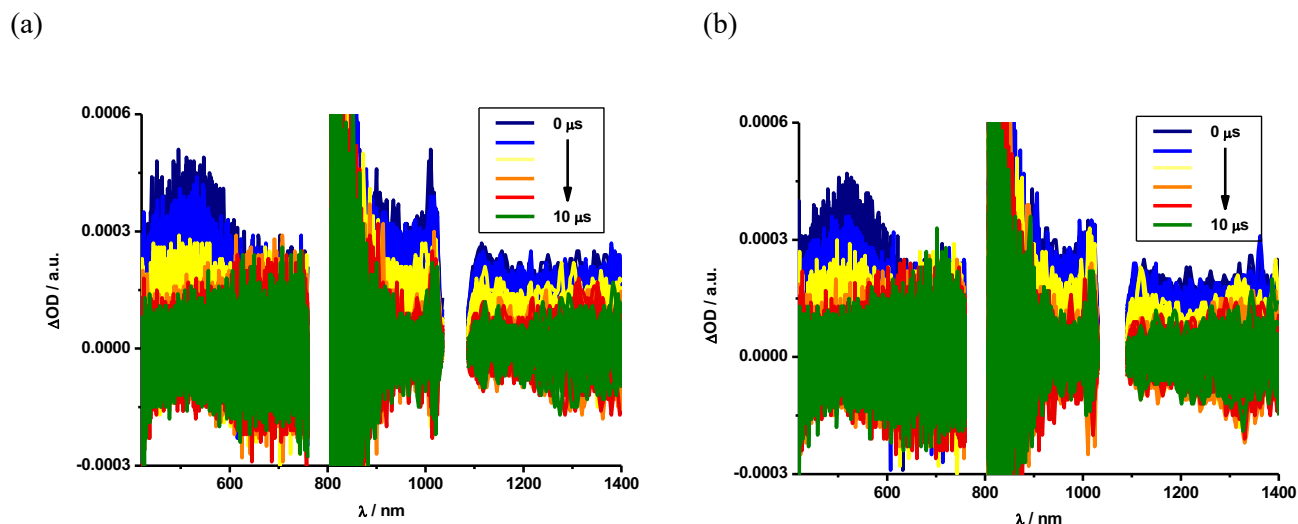

**Figure S12.** Raw data of all the transient absorption measurements of  $\text{Sc}_3\text{N}@I_h\text{-C}_{80}$  ( $\lambda_{\text{ex}} = 387 \text{ nm}$ ,  $E = 400 \text{ nJ}$ ) in the absence (a) and the presence (b) of **7**.

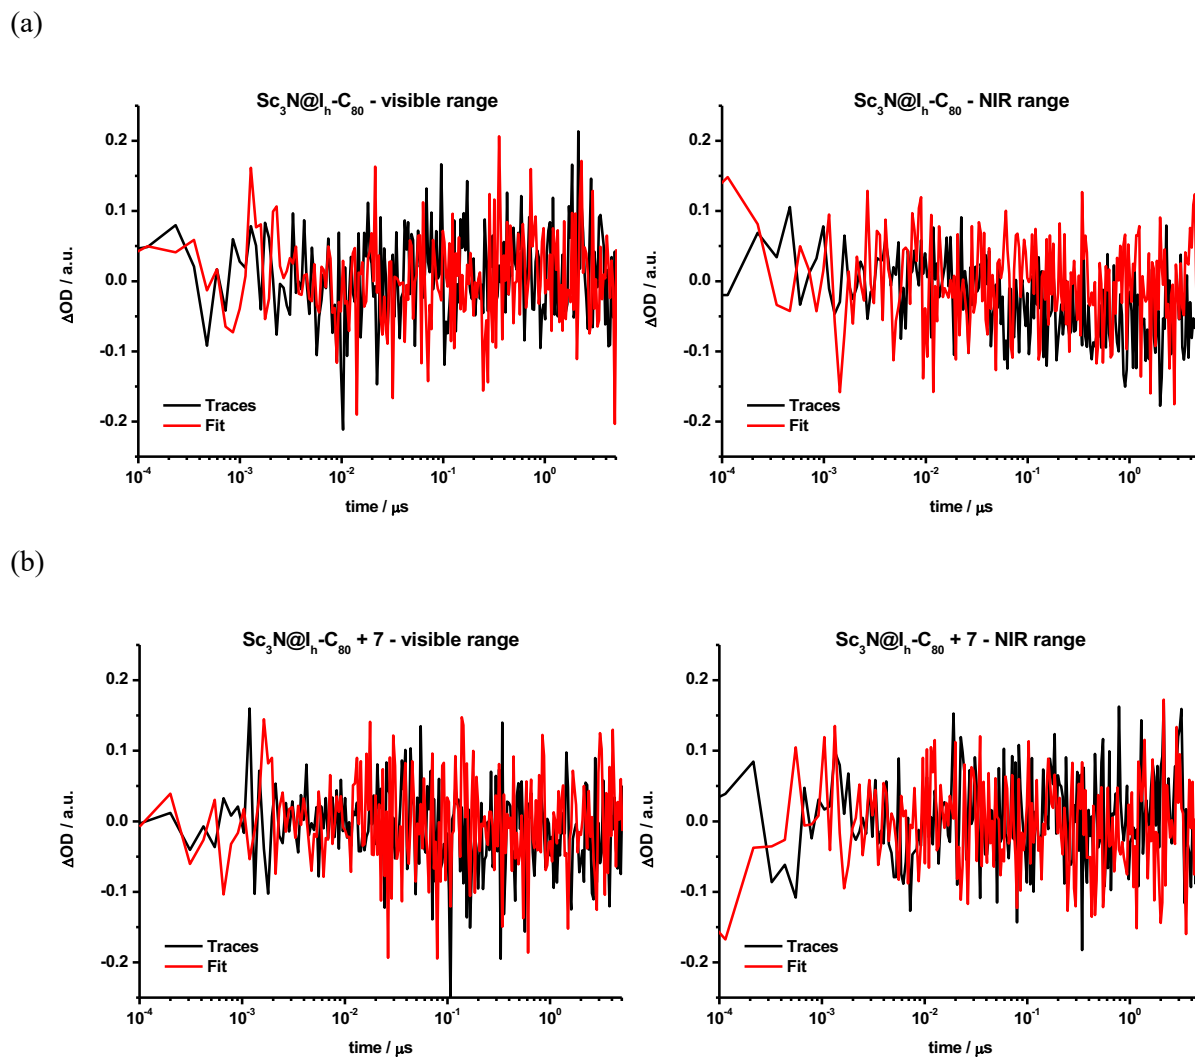

**Figure S13.** Residuals of the decay profiles from the transient absorption measurements (Figures 8 and S12) using  $\text{Sc}_3\text{N}@I_h\text{-C}_{80}$  in the absence (a) and the presence (b) of 200 times equimolar amounts of **7** at the visible and NIR regions.

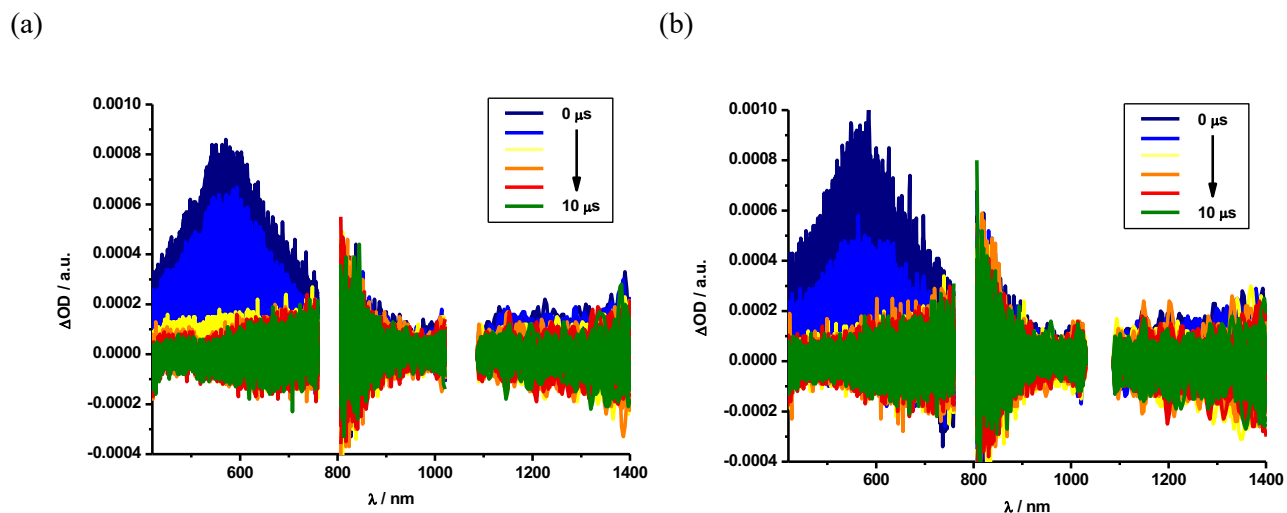

**Figure S14.** Raw data of all the transient absorption measurements of  $\text{Sc}_3\text{N}@D_{5h}\text{-C}_{80}$  ( $\lambda_{\text{ex}} = 387 \text{ nm}$ ,  $E = 400 \text{ nJ}$ ) in the absence (a) and the presence (b) of **7**.

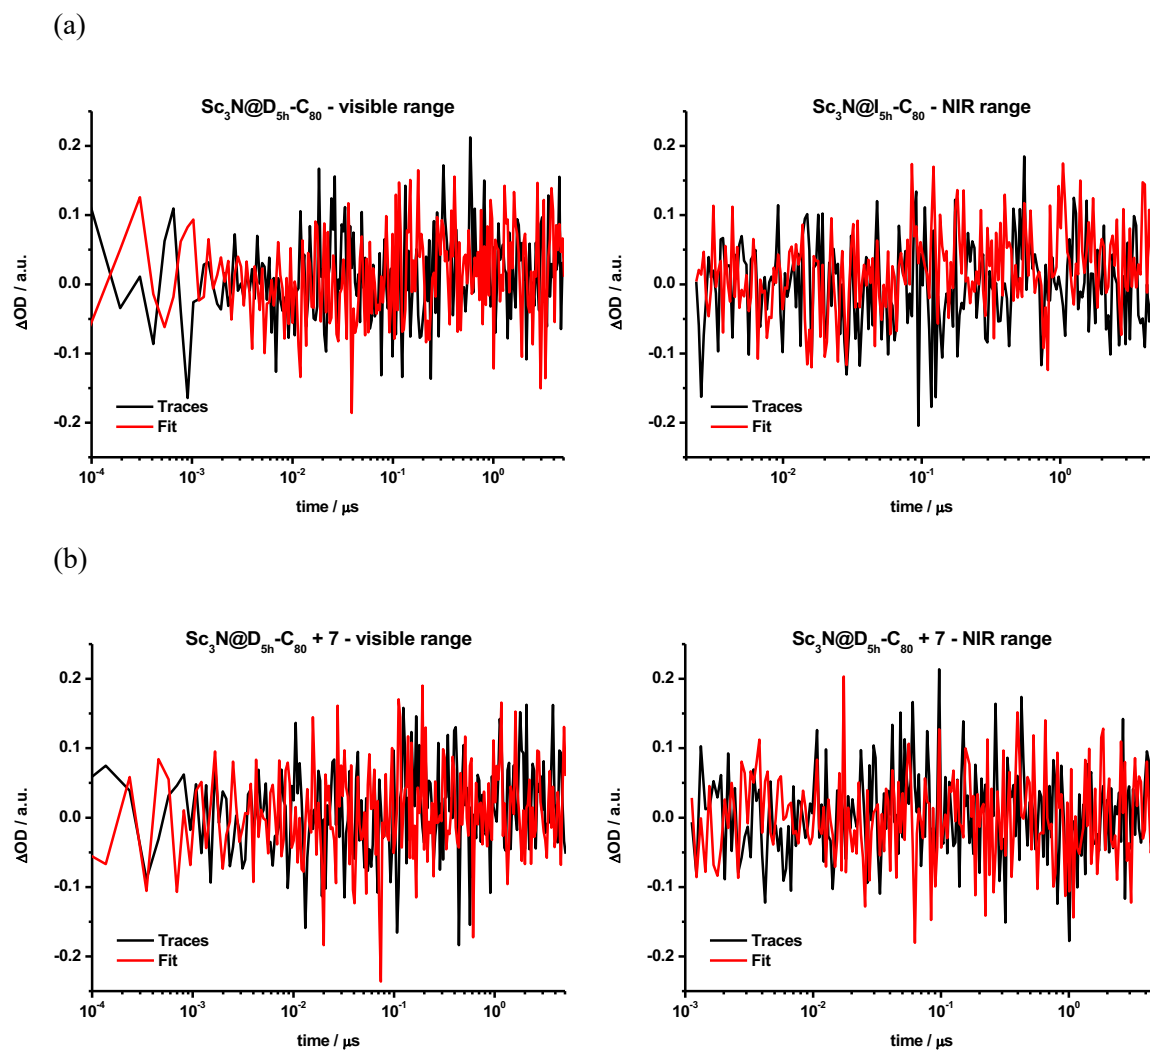

**Figure S15.** Residuals of the decay profiles from the transient absorption measurements (Figures 10 and S14) using  $\text{Sc}_3\text{N}@D_{5h}\text{-C}_{80}$  in the absence (a) and the presence (b) of 200 times equimolar amounts of **7** at the visible and NIR regions.

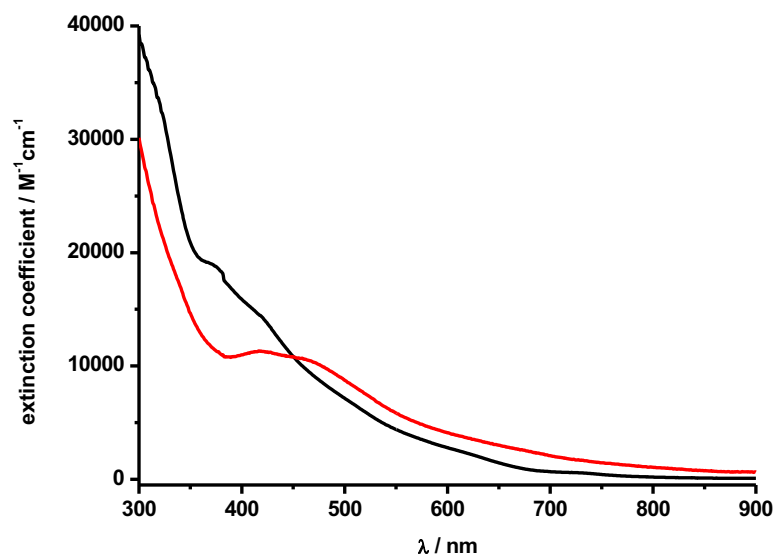

**Figure S16.** UV-Visible spectra of  $\text{Sc}_3\text{N}@I_h\text{-C}_{80}$  (black) and  $\text{Sc}_3\text{N}@D_{5h}\text{-C}_{80}$  (red) in toluene.

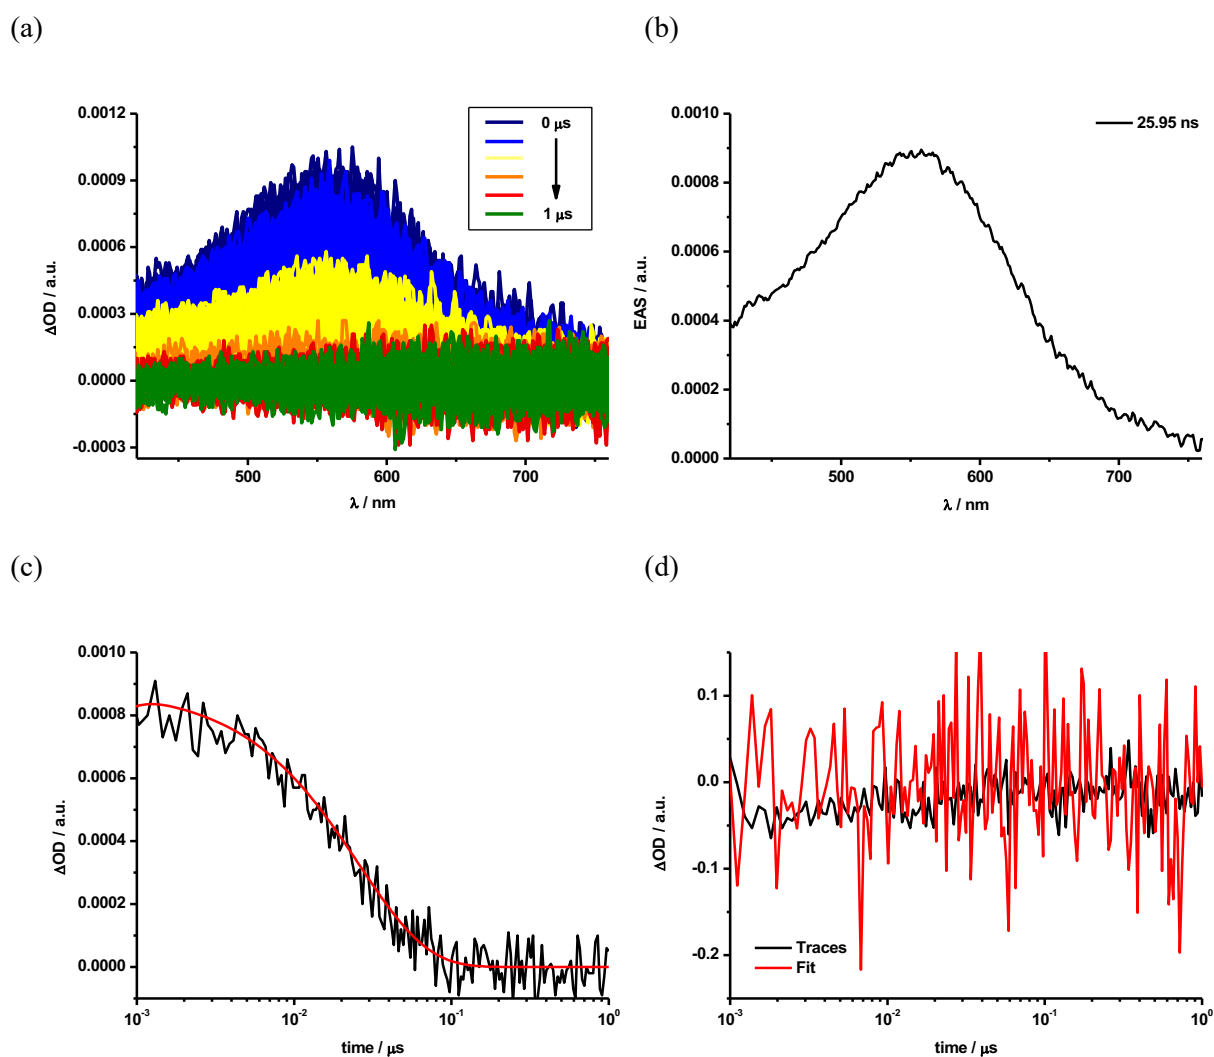

**Figure S17.** (a) Raw data of the transient absorption measurements of pure toluene ( $\lambda_{\text{ex}} = 387 \text{ nm}$ ,  $E = 400 \text{ nJ}$ ). (b) Respective evolution associated spectra (EAS) of the triplet excited state of pure toluene at the respective relative delay time. (c) Respective decay profiles of the transient absorption measurements at 555 nm. (d) Respective residuals of the decay profile from the transient absorption measurement.

**Table S1.** Ten lowest excited states of  $\text{Sc}_3\text{N}@I_h\text{-C}_{80}$  calculated by TD-B3LYP/6-31G\*~SDD.

| Excited State  | Excitation Energy (eV) | Wavelength (nm) | Contribution                         |
|----------------|------------------------|-----------------|--------------------------------------|
| T <sub>1</sub> | 1.8208                 | 680.93          | HOMO -> LUMO                         |
| T <sub>2</sub> | 1.9152                 | 647.38          | HOMO-1 -> LUMO                       |
| T <sub>3</sub> | 1.9158                 | 647.18          | HOMO-2 -> LUMO                       |
| S <sub>1</sub> | 1.9539                 | 634.54          | HOMO -> LUMO                         |
| T <sub>4</sub> | 2.0441                 | 606.54          | HOMO -> LUMO+1                       |
| T <sub>5</sub> | 2.0449                 | 606.29          | HOMO -> LUMO+2                       |
| S <sub>2</sub> | 2.0483                 | 605.30          | HOMO-1 -> LUMO<br>HOMO -> LUMO+1     |
| S <sub>3</sub> | 2.0493                 | 605.02          | HOMO-2 -> LUMO<br>HOMO -> LUMO+2     |
| T <sub>6</sub> | 2.0713                 | 598.59          | HOMO-1 -> LUMO+1<br>HOMO-2 -> LUMO+2 |
| T <sub>7</sub> | 2.0905                 | 593.09          | HOMO-3 -> LUMO<br>HOMO-1 -> LUMO+1   |

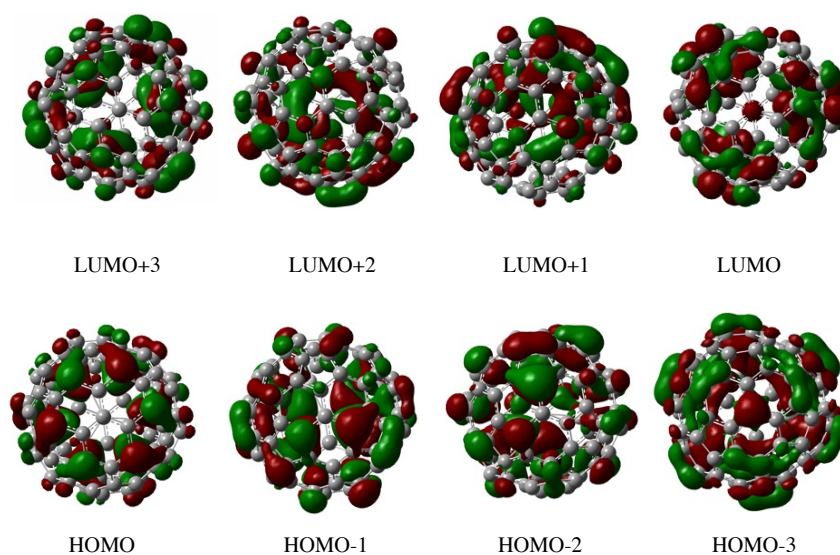**Figure S18.** Selected molecular orbitals of  $\text{Sc}_3\text{N}@I_h\text{-C}_{80}$ .

**Table S2.** Ten lowest excited states of  $\text{Sc}_3\text{N}@D_{5h}\text{-C}_{80}$  calculated by TD-B3LYP/6-31G\*~SDD.

| Excited State  | Excitation Energy (eV) | Wavelength (nm) | Contribution                       |
|----------------|------------------------|-----------------|------------------------------------|
| T <sub>1</sub> | 1.4945                 | 829.62          | HOMO -> LUMO<br>HOMO-1 -> LUMO     |
| S <sub>1</sub> | 1.6184                 | 766.08          | HOMO -> LUMO<br>HOMO-1 -> LUMO     |
| T <sub>2</sub> | 1.6513                 | 750.84          | HOMO-1 -> LUMO+1<br>HOMO -> LUMO+1 |
| T <sub>3</sub> | 1.7092                 | 725.41          | HOMO-1 -> LUMO<br>HOMO -> LUMO+3   |
| T <sub>4</sub> | 1.7392                 | 712.90          | HOMO-2 -> LUMO<br>HOMO -> LUMO+1   |
| T <sub>5</sub> | 1.7418                 | 711.83          | HOMO-2 -> LUMO<br>HOMO -> LUMO+1   |
| T <sub>6</sub> | 1.7905                 | 692.46          | HOMO -> LUMO+3<br>HOMO-1 -> LUMO+2 |
| S <sub>2</sub> | 1.7965                 | 690.12          | HOMO-1 -> LUMO<br>HOMO -> LUMO+1   |
| S <sub>3</sub> | 1.8146                 | 683.25          | HOMO -> LUMO+1<br>HOMO-1 -> LUMO   |
| T <sub>7</sub> | 1.8213                 | 680.73          | HOMO -> LUMO+2<br>HOMO -> LUMO+3   |

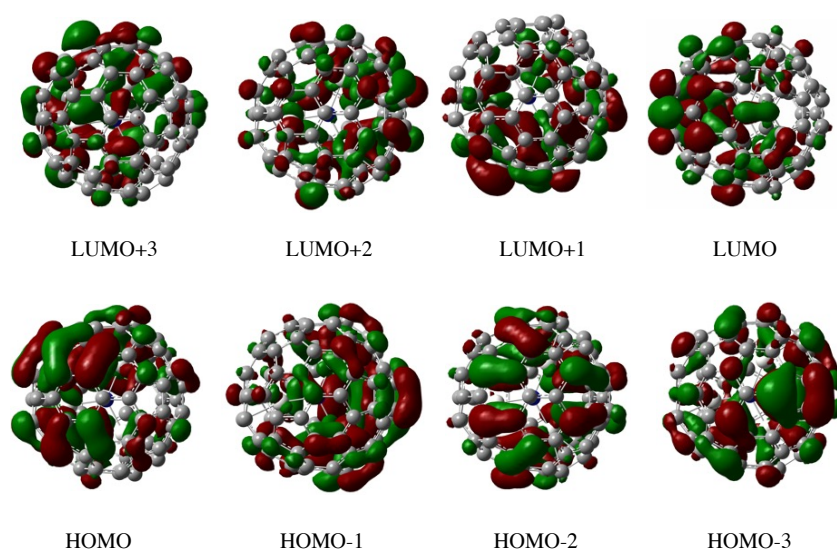**Figure S19.** Selected molecular orbitals of  $\text{Sc}_3\text{N}@D_{5h}\text{-C}_{80}$ .

**Table S3.** Cartesian coordinates of optimized structures.Sc<sub>3</sub>N@I<sub>h</sub>-C<sub>80</sub>

|    |             |             |             |
|----|-------------|-------------|-------------|
| Sc | -0.20297500 | 2.02489500  | 0.00000000  |
| Sc | -0.20993400 | -1.02212200 | 1.74685900  |
| Sc | -0.20993400 | -1.02212200 | -1.74685900 |
| N  | -0.10854300 | 0.00314900  | 0.00000000  |
| C  | 0.27669800  | 2.64784400  | 3.15645800  |
| C  | 1.40199600  | 3.03598300  | 2.37066800  |
| C  | 1.12246100  | 3.78216900  | 1.16288000  |
| C  | 2.55644500  | 2.20968300  | 2.38861800  |
| C  | 0.27500600  | 1.41110700  | 3.87196500  |
| C  | 1.11591700  | -0.88437900 | 3.85516000  |
| C  | 1.39871400  | 0.53384500  | 3.81613200  |
| C  | 2.55566400  | 0.96048600  | 3.11154800  |
| C  | 3.38871700  | 2.04363000  | 1.22330700  |
| C  | 3.08152200  | 2.70032500  | 0.00000000  |
| C  | 1.93866800  | 3.57659700  | 0.00000000  |
| C  | 3.90220300  | 0.70252200  | 1.22427700  |
| C  | 4.11278900  | -0.00474800 | 0.00000000  |
| C  | 1.93110000  | -1.79044300 | 3.09725400  |
| C  | 3.07572500  | -1.35466500 | 2.34053000  |
| C  | 3.38589500  | 0.03232900  | 2.38478800  |
| C  | 3.38355800  | -2.08691900 | 1.16118600  |
| C  | -2.47665400 | 3.16962400  | 0.72436000  |
| C  | -1.33814900 | 3.61394500  | 1.47412400  |
| C  | -0.21269100 | 4.16966100  | 0.73572400  |
| C  | -1.06764000 | 2.89692600  | 2.68564800  |
| C  | -3.32087800 | 2.08731600  | 1.16479500  |
| C  | -3.32354600 | -0.02714200 | 2.38593000  |
| C  | -3.01750300 | 1.36597900  | 2.35749900  |
| C  | -1.89997700 | 1.80636900  | 3.12320600  |
| C  | -4.05670500 | 0.00639300  | 0.00000000  |
| C  | -3.82871800 | 1.41757100  | 0.00000000  |
| C  | -2.48115200 | -0.95091700 | 3.10313200  |
| C  | -1.34284700 | -0.52601600 | 3.86412300  |
| C  | -1.07025400 | 0.88146400  | 3.85110000  |
| C  | -0.21974500 | -1.44583400 | 3.97640200  |
| C  | -2.48269000 | -2.20569100 | 2.37892100  |
| C  | -1.07552900 | -3.77101000 | 1.16445000  |
| C  | -1.34713400 | -3.08093300 | 2.39201600  |
| C  | -0.22171600 | -2.72183000 | 3.24361900  |
| C  | -1.90545000 | -3.60052800 | 0.00000000  |

|   |             |             |             |
|---|-------------|-------------|-------------|
| C | -3.02237500 | -2.71648600 | 0.00000000  |
| C | -3.32521200 | -2.04375100 | 1.22059200  |
| C | 1.11414100  | -2.89981100 | 2.69505300  |
| C | 0.26881700  | -4.05793400 | 0.71467200  |
| C | 1.39450500  | -3.57410500 | 1.44584200  |
| C | 2.55008700  | -3.17811500 | 0.72164400  |
| C | 3.90043400  | -1.41829400 | 0.00000000  |
| C | -3.83112500 | -0.69977800 | 1.22267600  |
| C | 0.27669800  | 2.64784400  | -3.15645800 |
| C | 1.40199600  | 3.03598300  | -2.37066800 |
| C | 1.12246100  | 3.78216900  | -1.16288000 |
| C | 2.55644500  | 2.20968300  | -2.38861800 |
| C | 0.27500600  | 1.41110700  | -3.87196500 |
| C | 1.11591700  | -0.88437900 | -3.85516000 |
| C | 1.39871400  | 0.53384500  | -3.81613200 |
| C | 2.55566400  | 0.96048600  | -3.11154800 |
| C | 3.38871700  | 2.04363000  | -1.22330700 |
| C | 3.90220300  | 0.70252200  | -1.22427700 |
| C | 1.93110000  | -1.79044300 | -3.09725400 |
| C | 3.07572500  | -1.35466500 | -2.34053000 |
| C | 3.38589500  | 0.03232900  | -2.38478800 |
| C | 3.38355800  | -2.08691900 | -1.16118600 |
| C | -2.47665400 | 3.16962400  | -0.72436000 |
| C | -1.33814900 | 3.61394500  | -1.47412400 |
| C | -0.21269100 | 4.16966100  | -0.73572400 |
| C | -1.06764000 | 2.89692600  | -2.68564800 |
| C | -3.32087800 | 2.08731600  | -1.16479500 |
| C | -3.32354600 | -0.02714200 | -2.38593000 |
| C | -3.01750300 | 1.36597900  | -2.35749900 |
| C | -1.89997700 | 1.80636900  | -3.12320600 |
| C | -2.48115200 | -0.95091700 | -3.10313200 |
| C | -1.34284700 | -0.52601600 | -3.86412300 |
| C | -1.07025400 | 0.88146400  | -3.85110000 |
| C | -0.21974500 | -1.44583400 | -3.97640200 |
| C | -2.48269000 | -2.20569100 | -2.37892100 |
| C | -1.07552900 | -3.77101000 | -1.16445000 |
| C | -1.34713400 | -3.08093300 | -2.39201600 |
| C | -0.22171600 | -2.72183000 | -3.24361900 |
| C | -3.32521200 | -2.04375100 | -1.22059200 |
| C | 1.11414100  | -2.89981100 | -2.69505300 |
| C | 0.26881700  | -4.05793400 | -0.71467200 |
| C | 1.39450500  | -3.57410500 | -1.44584200 |



|                                                |             |             |             |
|------------------------------------------------|-------------|-------------|-------------|
| C                                              | 2.55008700  | -3.17811500 | -0.72164400 |
| C                                              | -3.83112500 | -0.69977800 | -1.22267600 |
| <br>$\text{Sc}_3\text{N}@D_{5h}\text{-C}_{80}$ |             |             |             |
| Sc                                             | -1.99641700 | -0.42445500 | 0.00559000  |
| Sc                                             | 0.64791300  | 1.92257000  | -0.17148600 |
| Sc                                             | 1.04774200  | -1.74321900 | -0.09550800 |
| N                                              | -0.02417600 | -0.01847100 | -0.05168100 |
| C                                              | 3.03826300  | 0.84177200  | 2.70651900  |
| C                                              | 3.08618200  | -0.59276300 | 2.72261000  |
| C                                              | 1.96628400  | -1.05977500 | 3.50144200  |
| C                                              | 1.23503700  | 0.08169300  | 3.96923800  |
| C                                              | 1.89384100  | 1.25642500  | 3.47783200  |
| C                                              | 1.13481300  | 2.40549900  | 3.12107700  |
| C                                              | 1.60218600  | 3.16724200  | 1.99828100  |
| C                                              | 2.74090100  | 2.75691800  | 1.23166100  |
| C                                              | 3.46435400  | 1.55999400  | 1.55505300  |
| C                                              | 4.04671400  | 0.85174300  | 0.46763500  |
| C                                              | 4.08776100  | -0.57508300 | 0.48273500  |
| C                                              | 3.56058000  | -1.30502900 | 1.58346400  |
| C                                              | 2.93892700  | -2.57140200 | 1.28140200  |
| C                                              | 1.80621900  | -3.01170800 | 2.04982800  |
| C                                              | 1.28167000  | -2.25754800 | 3.15608900  |
| C                                              | -0.11680800 | -2.34168000 | 3.39519200  |
| C                                              | -0.84835200 | -1.20031900 | 3.86515700  |
| C                                              | -0.18936300 | 0.04223000  | 4.10402100  |
| C                                              | -0.92500200 | 1.23476300  | 3.84431000  |
| C                                              | -0.26493600 | 2.41109000  | 3.36282400  |
| C                                              | -1.17046900 | 3.10193800  | 2.46253200  |
| C                                              | -0.71205500 | 3.77134900  | 1.29125400  |
| C                                              | 0.72400400  | 3.92137700  | 1.13396900  |
| C                                              | 1.37786500  | 4.05047000  | -0.15761500 |
| C                                              | 2.59221600  | 3.25898800  | -0.11892400 |
| C                                              | 3.02503000  | 2.41971700  | -1.22689600 |
| C                                              | 3.81915100  | 1.28290000  | -0.90332400 |
| C                                              | 3.77442900  | 0.10759100  | -1.72227100 |
| C                                              | 3.87985300  | -1.04963600 | -0.88171700 |
| C                                              | 3.19451500  | -2.26346800 | -1.19259200 |
| C                                              | 2.84544200  | -3.12903300 | -0.06361300 |
| C                                              | 1.62887400  | -3.93169100 | -0.09008100 |
| C                                              | 0.96606600  | -3.80846600 | 1.19276800  |
| C                                              | -0.47701200 | -3.75562800 | 1.34999400  |

|   |             |             |             |
|---|-------------|-------------|-------------|
| C | -0.98045900 | -3.09735600 | 2.50861300  |
| C | -2.25001300 | -2.43106600 | 2.49389600  |
| C | -2.16631600 | -1.24112100 | 3.27827500  |
| C | -2.85794500 | -0.04918800 | 2.87595300  |
| C | -2.24701600 | 1.18719900  | 3.25247100  |
| C | -2.39727600 | 2.35988800  | 2.44813300  |
| C | -3.18112700 | 2.32245000  | 1.28850000  |
| C | -3.85480000 | 1.11352800  | 0.90825200  |
| C | -3.73287200 | -0.08838200 | 1.67953300  |
| C | -3.88569600 | -1.33262600 | 0.94128900  |
| C | -3.03848800 | -2.43356400 | 1.32509900  |
| C | -2.55487700 | -3.09738300 | 0.15633300  |
| C | -1.28409400 | -3.76533700 | 0.13699900  |
| C | -0.63809100 | -3.84915800 | -1.13529700 |
| C | 0.79555100  | -3.87814900 | -1.24732700 |
| C | 1.16235300  | -3.09439100 | -2.39740500 |
| C | 2.34193900  | -2.26961800 | -2.40182300 |
| C | 2.29195800  | -1.11772400 | -3.24176700 |
| C | 2.99889700  | 0.07415700  | -2.88455800 |
| C | 2.21841100  | 1.21345000  | -3.26490300 |
| C | 2.18886800  | 2.37084100  | -2.43640000 |
| C | 0.97006400  | 3.13993300  | -2.44382400 |
| C | 0.55548700  | 3.95138300  | -1.32458500 |
| C | -0.87273400 | 3.81164400  | -1.19877500 |
| C | -1.53373100 | 3.72378500  | 0.07726700  |
| C | -2.77682100 | 3.02286100  | 0.10882500  |
| C | -3.24890000 | 2.27743200  | -1.03521100 |
| C | -3.93039400 | 1.10149200  | -0.55619400 |
| C | -3.95132900 | -0.12228700 | -1.30728400 |
| C | -3.97760000 | -1.35932800 | -0.54486500 |
| C | -3.11540500 | -2.43834900 | -0.99592600 |
| C | -2.37296700 | -2.42220100 | -2.23256500 |
| C | -1.16484100 | -3.17472200 | -2.30121400 |
| C | -0.05233400 | -2.70034600 | -3.07435500 |
| C | -0.12282400 | -1.47735800 | -3.80563400 |
| C | 1.07164400  | -0.71234300 | -3.91265600 |
| C | 1.02664200  | 0.72130800  | -3.92611600 |
| C | -0.21212600 | 1.41418200  | -3.82442400 |
| C | -0.21687300 | 2.64900700  | -3.10661600 |
| C | -1.35420500 | 3.07200100  | -2.34611700 |
| C | -2.52497900 | 2.26385500  | -2.26279000 |
| C | -2.55237100 | 1.06687800  | -3.03663500 |

|   |             |             |             |
|---|-------------|-------------|-------------|
| C | -3.22202600 | -0.10888700 | -2.54539800 |
| C | -2.47904100 | -1.25418300 | -3.03193100 |
| C | -1.37657700 | -0.78308600 | -3.81547500 |
| C | -1.42097100 | 0.64982400  | -3.81601400 |

**Compound 2**

|   |             |             |             |
|---|-------------|-------------|-------------|
| N | 2.55629900  | 0.04256600  | -0.02513200 |
| C | -4.38130300 | 0.01923500  | -0.06288600 |
| C | 6.41795300  | -0.31388200 | -1.43237100 |
| C | 5.64654800  | -0.53887700 | -2.61996900 |
| C | 4.94601800  | 0.52466000  | -3.31468400 |
| C | 4.91395100  | -1.76112100 | -2.83282800 |
| C | 3.79415200  | -0.04110700 | -3.94649100 |
| C | 3.76768100  | -1.45525200 | -3.64262800 |
| C | 2.57874800  | 0.69784400  | -4.02612700 |
| C | 2.54207400  | -2.18005700 | -3.48854100 |
| C | 1.35442400  | -0.05623300 | -3.89801500 |
| C | 1.29341800  | -1.49065100 | -3.72812000 |
| C | 0.21793600  | 0.51647300  | -3.24010600 |
| C | 0.08122500  | -1.80296900 | -2.96323400 |
| C | -0.53803000 | -0.53605300 | -2.62532700 |
| C | -1.29325100 | -0.27414900 | -1.42529900 |
| C | 6.39500500  | -1.37129400 | -0.45693300 |
| C | 5.65863300  | -2.59396800 | -0.66576500 |
| C | 6.38736800  | -1.09639500 | 0.96923700  |
| C | 4.88199700  | -2.79295100 | -1.84700900 |
| C | 5.20758400  | -3.07188700 | 0.61261500  |
| C | 5.64913100  | -2.15357500 | 1.61889800  |
| C | 3.68512500  | -3.55700500 | -1.72496500 |
| C | 3.96365700  | -3.76722300 | 0.74696700  |
| C | 4.87008800  | -1.90749300 | 2.79464900  |
| C | 3.23237600  | -4.03832600 | -0.45164600 |
| C | 2.52548900  | -3.23555700 | -2.51952700 |
| C | 3.22804600  | -3.58273800 | 1.95181600  |
| C | 3.67630900  | -2.66869200 | 2.96738300  |
| C | 1.79775000  | -4.01116400 | -0.45468400 |
| C | 1.34679100  | -3.52392800 | -1.73251900 |
| C | 1.78685500  | -3.56997600 | 1.94326100  |
| C | 2.51368700  | -2.08283600 | 3.58195000  |
| C | 1.05796800  | -3.72877600 | 0.72886700  |
| C | 1.34729400  | -2.64407500 | 2.94314200  |
| C | 0.10340200  | -2.80997300 | -1.89597300 |

|   |             |             |             |
|---|-------------|-------------|-------------|
| C | -0.16740600 | -3.00773900 | 0.56163800  |
| C | -0.65141500 | -2.56925500 | -0.71648100 |
| C | 0.18061700  | -1.86430500 | 2.72658800  |
| C | -0.60690700 | -2.08890500 | 1.56416000  |
| C | -1.67114700 | -1.43103700 | -0.51295100 |
| C | -1.33790000 | -1.03461900 | 0.93413100  |
| C | -6.75647000 | -3.30885400 | -3.66650600 |
| C | -7.09985600 | -3.11383500 | -2.32980300 |
| C | -5.43475600 | -3.05243800 | -4.02489500 |
| C | -6.17676500 | -2.68873600 | -1.36474900 |
| C | -4.47975200 | -2.62044600 | -3.09664000 |
| C | -6.72232400 | -2.57345200 | 0.04818500  |
| C | -4.82317500 | -2.42396100 | -1.73521500 |
| C | -3.08747400 | -2.38154100 | -3.62232700 |
| C | -4.37412000 | -1.32955500 | 2.94878600  |
| C | -3.75354400 | -3.03313300 | 1.09829500  |
| C | -4.04158200 | -2.72225300 | 2.45643200  |
| C | -3.21647400 | -4.90765800 | -0.61998700 |
| C | -3.49451000 | -4.39794400 | 0.78283400  |
| C | -4.05651900 | -3.73244000 | 3.42558300  |
| C | -3.51611500 | -5.37311000 | 1.78846200  |
| C | -3.79206700 | -5.06737700 | 3.11954500  |
| H | -5.00068100 | 0.12801300  | -0.95619700 |
| H | -8.12520000 | -3.30191700 | -2.01665100 |
| H | -5.12888600 | -3.18901300 | -5.06040500 |
| H | -7.81623200 | -2.60049200 | 0.02979000  |
| H | -6.43479900 | -1.64546400 | 0.54785200  |
| H | -2.33583600 | -2.93949500 | -3.05846100 |
| H | -2.81082500 | -1.32369900 | -3.58156100 |
| H | -4.31625300 | -1.28675600 | 4.04077000  |
| H | -3.69295700 | -0.57300900 | 2.55571800  |
| H | -2.71098800 | -5.87774500 | -0.57441000 |
| H | -2.57471800 | -4.24236200 | -1.20203400 |
| H | -4.28068200 | -3.46198900 | 4.45571200  |
| H | -3.30743200 | -6.40590100 | 1.51574100  |
| C | 6.40105200  | 0.24628300  | 1.47590200  |
| C | 5.62501400  | 0.47307100  | 2.65992400  |
| C | 4.90897400  | -0.58579000 | 3.33224000  |
| C | 4.89911300  | 1.70306400  | 2.87736900  |
| C | 3.75466400  | -0.00990900 | 3.95776400  |
| C | 3.74137600  | 1.40613000  | 3.67368100  |
| C | 2.53191800  | -0.73581200 | 4.03553400  |

|   |             |             |             |
|---|-------------|-------------|-------------|
| C | 2.52335800  | 2.14163700  | 3.50170700  |
| C | 1.31299600  | 0.03192200  | 3.90285400  |
| C | 1.26439500  | 1.46716400  | 3.73427200  |
| C | 0.17538200  | -0.53013500 | 3.23555700  |
| C | 0.05898700  | 1.79172700  | 2.95812400  |
| C | -0.57024800 | 0.53068500  | 2.61718200  |
| C | -1.30545900 | 0.27619800  | 1.40059200  |
| C | 6.51416400  | 1.32763300  | 0.50624200  |
| C | 5.68065200  | 2.49804800  | 0.70721700  |
| C | 6.52590400  | 1.05096100  | -0.94062800 |
| C | 4.88161100  | 2.72306800  | 1.88818300  |
| C | 5.20926800  | 2.95877000  | -0.56815200 |
| C | 5.69355000  | 2.06132000  | -1.57436700 |
| C | 3.70031300  | 3.50351900  | 1.74649700  |
| C | 3.98929400  | 3.70557100  | -0.71934200 |
| C | 4.91155200  | 1.83904800  | -2.77011500 |
| C | 3.26252600  | 3.99866600  | 0.47145500  |
| C | 2.52776800  | 3.19150800  | 2.52833200  |
| C | 3.27787400  | 3.54138300  | -1.93546900 |
| C | 3.73073800  | 2.61778100  | -2.94506400 |
| C | 1.82719300  | 3.98317000  | 0.45988800  |
| C | 1.36115700  | 3.49199400  | 1.73027900  |
| C | 1.83568500  | 3.54272300  | -1.94117900 |
| C | 2.56642100  | 2.04564400  | -3.57144000 |
| C | 1.09871200  | 3.70695200  | -0.73148900 |
| C | 1.40016100  | 2.61904900  | -2.94420000 |
| C | 0.11002300  | 2.79042900  | 1.88293000  |
| C | -0.13750500 | 2.99672900  | -0.57544400 |
| C | -0.64044900 | 2.56487800  | 0.69583400  |
| C | 0.22245500  | 1.85126400  | -2.73773000 |
| C | -0.57576900 | 2.08354800  | -1.58419400 |
| C | -1.66858200 | 1.43571100  | 0.48332000  |
| C | -1.32634500 | 1.03732300  | -0.96201500 |
| C | -6.80258400 | 3.19787700  | 3.62967100  |
| C | -7.13013500 | 3.02033400  | 2.28624100  |
| C | -5.47598600 | 2.97719400  | 3.99241400  |
| C | -6.18802700 | 2.64014800  | 1.32132800  |
| C | -4.50143100 | 2.58965200  | 3.06405700  |
| C | -6.71474000 | 2.54468900  | -0.10019200 |
| C | -4.83068500 | 2.40205900  | 1.69813800  |
| C | -3.10719800 | 2.38556800  | 3.59954800  |
| C | -4.28030800 | 1.45898600  | -3.03737200 |

|    |             |             |             |
|----|-------------|-------------|-------------|
| C  | -3.72688000 | 3.10092100  | -1.10475600 |
| C  | -3.98967200 | 2.83723300  | -2.47930700 |
| C  | -3.21664600 | 4.91777400  | 0.68311800  |
| C  | -3.48713600 | 4.45645200  | -0.73759600 |
| C  | -4.00908200 | 3.88323100  | -3.40904900 |
| C  | -3.51238100 | 5.46883600  | -1.70650100 |
| C  | -3.77792600 | 5.21121900  | -3.04897900 |
| H  | -5.10487100 | -0.08261300 | 0.75019500  |
| H  | -8.15745900 | 3.18780400  | 1.96790200  |
| H  | -5.18094400 | 3.10724600  | 5.03192300  |
| H  | -7.80882800 | 2.56812900  | -0.09669300 |
| H  | -6.41662100 | 1.62513600  | -0.60915200 |
| H  | -2.35662900 | 2.90414400  | 2.99959000  |
| H  | -2.83133500 | 1.32670400  | 3.62772400  |
| H  | -4.20587200 | 1.46832800  | -4.12911500 |
| H  | -3.58454500 | 0.70266900  | -2.66949400 |
| H  | -2.73582000 | 5.90131000  | 0.67344300  |
| H  | -2.55470500 | 4.24673200  | 1.23543700  |
| H  | -4.20777100 | 3.64721100  | -4.45279500 |
| H  | -3.31367800 | 6.49223500  | -1.39418400 |
| Sc | 1.54038100  | 0.90256600  | 1.51981300  |
| Sc | 1.57733600  | -0.98021500 | -1.48961800 |
| Sc | 4.53850000  | 0.34472800  | -0.07515700 |
| C  | -3.77297000 | -6.13084600 | 4.19127600  |
| H  | -2.77656500 | -6.21566400 | 4.64538800  |
| H  | -4.47799500 | -5.90132200 | 4.99765200  |
| H  | -4.02888700 | -7.11489200 | 3.78417100  |
| C  | -7.76655100 | -3.80100700 | -4.67534500 |
| H  | -7.52930900 | -3.44885600 | -5.68497400 |
| H  | -7.78869600 | -4.89859600 | -4.71092300 |
| H  | -8.77897300 | -3.46487500 | -4.42651100 |
| C  | -7.83490300 | 3.63857600  | 4.63983700  |
| H  | -7.58504500 | 3.28868700  | 5.64714900  |
| H  | -7.90457800 | 4.73385400  | 4.68380900  |
| H  | -8.83144000 | 3.26121600  | 4.38579100  |
| C  | -3.82757300 | 6.32081400  | -4.07182500 |
| H  | -3.38146900 | 6.00964000  | -5.02303700 |
| H  | -4.86338500 | 6.61885500  | -4.28315100 |
| H  | -3.29568000 | 7.21167300  | -3.72235700 |
| H  | -4.14248300 | -5.04232800 | -1.19017400 |
| H  | -5.39332600 | -1.02859800 | 2.67449800  |
| H  | -6.36674600 | 3.37968600  | -0.71711900 |

|    |             |             |             |
|----|-------------|-------------|-------------|
| H  | -3.01954900 | 2.76549200  | 4.62243700  |
| H  | -4.14262800 | 5.00635100  | 1.26170100  |
| H  | -5.29598300 | 1.12189700  | -2.79369500 |
| H  | -3.00217100 | -2.69456200 | -4.66771800 |
| H  | -6.38061000 | -3.39764900 | 0.68283800  |
| Si | -3.65580900 | -1.75378900 | -0.33568700 |
| Si | -3.64673600 | 1.77576900  | 0.29096200  |

Compound **9**

|   |             |             |             |
|---|-------------|-------------|-------------|
| N | 0.00000000  | 0.00000000  | 2.88276300  |
| C | 0.00000000  | 0.00000000  | -4.24316500 |
| C | -1.48854900 | 0.00364100  | 6.74088000  |
| C | -2.68578200 | 0.00394100  | 5.95218100  |
| C | -3.16273000 | -1.16690100 | 5.24336000  |
| C | -3.13098700 | 1.16911700  | 5.22366900  |
| C | -3.88741800 | -0.72352000 | 4.09133200  |
| C | -3.86318300 | 0.72206600  | 4.07251700  |
| C | -3.82610400 | -1.45763100 | 2.87102400  |
| C | -3.83241700 | 1.46781900  | 2.84916400  |
| C | -3.84272700 | -0.68717100 | 1.64788100  |
| C | -3.94088800 | 0.75426700  | 1.59541600  |
| C | -3.09170400 | -1.12246900 | 0.50612900  |
| C | -3.24682400 | 1.21177900  | 0.38472800  |
| C | -2.68678400 | 0.03177900  | -0.24844500 |
| C | -1.44294000 | 0.00639700  | -0.97918100 |
| C | -0.72616500 | 1.23550900  | 6.77605100  |
| C | -1.14883000 | 2.36663500  | 5.97842900  |
| C | 0.73768200  | 1.23220900  | 6.77647600  |
| C | -2.35111300 | 2.36020200  | 5.19621500  |
| C | 0.01577200  | 3.06782100  | 5.51842000  |
| C | 1.17182400  | 2.36101900  | 5.97843000  |
| C | -2.36615700 | 3.14597500  | 4.00890900  |
| C | 0.02160300  | 3.80799500  | 4.29077000  |
| C | 2.38238300  | 2.35748400  | 5.20309400  |
| C | -1.20470400 | 3.86309000  | 3.56269300  |
| C | -3.07687400 | 2.68335800  | 2.84339600  |
| C | 1.24407500  | 3.86246000  | 3.56703700  |
| C | 2.40966900  | 3.14857200  | 4.01787900  |
| C | -1.19601900 | 3.84428900  | 2.12746200  |
| C | -2.35396400 | 3.12109400  | 1.67114800  |
| C | 1.24465600  | 3.85809700  | 2.12623800  |
| C | 3.12808000  | 2.69571400  | 2.85531600  |

|   |             |             |             |
|---|-------------|-------------|-------------|
| C | 0.02348000  | 3.79518300  | 1.39247400  |
| C | 2.40223300  | 3.13661800  | 1.68794700  |
| C | -2.37697500 | 2.39371000  | 0.42707700  |
| C | 0.00000000  | 3.06058500  | 0.16385700  |
| C | -1.16937200 | 2.38686200  | -0.32277200 |
| C | 2.34242700  | 2.33860100  | 0.51520500  |
| C | 1.16039900  | 2.34835800  | -0.27669000 |
| C | -0.74859400 | 1.30712200  | -1.32136400 |
| C | 0.73806000  | 1.19523800  | -1.00633400 |
| C | -4.35660900 | 2.24045400  | -6.54088000 |
| C | -3.02863900 | 2.32666500  | -6.94045100 |
| C | -4.64586300 | 2.10739100  | -5.18858200 |
| C | -1.97783400 | 2.25951600  | -6.01352500 |
| C | -3.62531200 | 2.04315800  | -4.22707900 |
| C | -0.58004100 | 2.39598500  | -6.60473000 |
| C | -2.27020800 | 2.09073300  | -4.63189400 |
| C | -4.05213900 | 1.91967500  | -2.77826700 |
| C | 2.75798300  | 1.99615100  | -3.90589500 |
| C | 0.57021100  | 3.36261500  | -3.48080700 |
| C | 1.96939600  | 3.28294700  | -3.70962700 |
| C | -1.47249600 | 4.88229800  | -2.89928900 |
| C | -0.00966600 | 4.63916900  | -3.24900100 |
| C | 2.73325100  | 4.45882700  | -3.74775400 |
| C | 0.79552500  | 5.78741500  | -3.29212300 |
| C | 2.15798700  | 5.70764000  | -3.55009800 |
| C | -0.27700900 | 3.80312800  | -7.14956100 |
| C | -5.01756300 | 3.01724600  | -2.29972600 |
| C | 3.23370700  | 1.77171300  | -5.35308000 |
| C | -2.25914700 | 5.64426400  | -3.97948800 |
| H | -0.82587100 | -0.26086000 | -4.90875100 |
| H | -5.15715900 | 2.27862900  | -7.27506700 |
| H | -2.78964600 | 2.44230200  | -7.99536900 |
| H | -5.68189400 | 2.04748300  | -4.86525800 |
| H | -0.47441100 | 1.66789500  | -7.42078700 |
| H | 0.18991300  | 2.14371300  | -5.87683100 |
| H | -3.16993400 | 1.93691600  | -2.14179500 |
| H | -4.52140100 | 0.93932000  | -2.61454100 |
| H | 3.64380000  | 2.04213400  | -3.25821500 |
| H | 2.19297200  | 1.12918700  | -3.56395100 |
| H | -1.50385200 | 5.46131900  | -1.96643100 |
| H | -1.98878300 | 3.94634800  | -2.67819800 |
| H | 3.80498700  | 4.38068800  | -3.91818300 |



|   |             |             |             |
|---|-------------|-------------|-------------|
| H | 0.34053600  | 6.75585200  | -3.09676100 |
| H | 2.76900400  | 6.60625700  | -3.57176100 |
| H | 0.71752700  | 3.82776300  | -7.60961100 |
| H | -1.00734200 | 4.10582800  | -7.90794800 |
| H | -0.29443100 | 4.54581000  | -6.34622300 |
| H | -5.96297200 | 3.00005800  | -2.85154300 |
| H | -5.25117100 | 2.87797000  | -1.23855900 |
| H | -4.57824500 | 4.01290000  | -2.42493000 |
| H | 2.39126100  | 1.68905900  | -6.04842800 |
| H | 3.85626800  | 2.60645500  | -5.69413300 |
| H | 3.82262200  | 0.85159900  | -5.42923100 |
| H | -3.28269900 | 5.84330300  | -3.64150200 |
| H | -1.78978400 | 6.60780500  | -4.20661000 |
| H | -2.31680100 | 5.06788600  | -4.90736300 |
| C | 1.48854900  | -0.00364100 | 6.74088000  |
| C | 2.68578200  | -0.00394100 | 5.95218100  |
| C | 3.16273000  | 1.16690100  | 5.24336000  |
| C | 3.13098700  | -1.16911700 | 5.22366900  |
| C | 3.88741800  | 0.72352000  | 4.09133200  |
| C | 3.86318300  | -0.72206600 | 4.07251700  |
| C | 3.82610400  | 1.45763100  | 2.87102400  |
| C | 3.83241700  | -1.46781900 | 2.84916400  |
| C | 3.84272700  | 0.68717100  | 1.64788100  |
| C | 3.94088800  | -0.75426700 | 1.59541600  |
| C | 3.09170400  | 1.12246900  | 0.50612900  |
| C | 3.24682400  | -1.21177900 | 0.38472800  |
| C | 2.68678400  | -0.03177900 | -0.24844500 |
| C | 1.44294000  | -0.00639700 | -0.97918100 |
| C | 0.72616500  | -1.23550900 | 6.77605100  |
| C | 1.14883000  | -2.36663500 | 5.97842900  |
| C | -0.73768200 | -1.23220900 | 6.77647600  |
| C | 2.35111300  | -2.36020200 | 5.19621500  |
| C | -0.01577200 | -3.06782100 | 5.51842000  |
| C | -1.17182400 | -2.36101900 | 5.97843000  |
| C | 2.36615700  | -3.14597500 | 4.00890900  |
| C | -0.02160300 | -3.80799500 | 4.29077000  |
| C | -2.38238300 | -2.35748400 | 5.20309400  |
| C | 1.20470400  | -3.86309000 | 3.56269300  |
| C | 3.07687400  | -2.68335800 | 2.84339600  |
| C | -1.24407500 | -3.86246000 | 3.56703700  |
| C | -2.40966900 | -3.14857200 | 4.01787900  |
| C | 1.19601900  | -3.84428900 | 2.12746200  |

|   |             |             |             |
|---|-------------|-------------|-------------|
| C | 2.35396400  | -3.12109400 | 1.67114800  |
| C | -1.24465600 | -3.85809700 | 2.12623800  |
| C | -3.12808000 | -2.69571400 | 2.85531600  |
| C | -0.02348000 | -3.79518300 | 1.39247400  |
| C | -2.40223300 | -3.13661800 | 1.68794700  |
| C | 2.37697500  | -2.39371000 | 0.42707700  |
| C | 0.00000000  | -3.06058500 | 0.16385700  |
| C | 1.16937200  | -2.38686200 | -0.32277200 |
| C | -2.34242700 | -2.33860100 | 0.51520500  |
| C | -1.16039900 | -2.34835800 | -0.27669000 |
| C | 0.74859400  | -1.30712200 | -1.32136400 |
| C | -0.73806000 | -1.19523800 | -1.00633400 |
| C | 4.35660900  | -2.24045400 | -6.54088000 |
| C | 3.02863900  | -2.32666500 | -6.94045100 |
| C | 4.64586300  | -2.10739100 | -5.18858200 |
| C | 1.97783400  | -2.25951600 | -6.01352500 |
| C | 3.62531200  | -2.04315800 | -4.22707900 |
| C | 0.58004100  | -2.39598500 | -6.60473000 |
| C | 2.27020800  | -2.09073300 | -4.63189400 |
| C | 4.05213900  | -1.91967500 | -2.77826700 |
| C | -2.75798300 | -1.99615100 | -3.90589500 |
| C | -0.57021100 | -3.36261500 | -3.48080700 |
| C | -1.96939600 | -3.28294700 | -3.70962700 |
| C | 1.47249600  | -4.88229800 | -2.89928900 |
| C | 0.00966600  | -4.63916900 | -3.24900100 |
| C | -2.73325100 | -4.45882700 | -3.74775400 |
| C | -0.79552500 | -5.78741500 | -3.29212300 |
| C | -2.15798700 | -5.70764000 | -3.55009800 |
| C | 0.27700900  | -3.80312800 | -7.14956100 |
| C | 5.01756300  | -3.01724600 | -2.29972600 |
| C | -3.23370700 | -1.77171300 | -5.35308000 |
| C | 2.25914700  | -5.64426400 | -3.97948800 |
| H | 0.82587100  | 0.26086000  | -4.90875100 |
| H | 5.15715900  | -2.27862900 | -7.27506700 |
| H | 2.78964600  | -2.44230200 | -7.99536900 |
| H | 5.68189400  | -2.04748300 | -4.86525800 |
| H | 0.47441100  | -1.66789500 | -7.42078700 |
| H | -0.18991300 | -2.14371300 | -5.87683100 |
| H | 3.16993400  | -1.93691600 | -2.14179500 |
| H | 4.52140100  | -0.93932000 | -2.61454100 |
| H | -3.64380000 | -2.04213400 | -3.25821500 |
| H | -2.19297200 | -1.12918700 | -3.56395100 |

|    |             |             |             |
|----|-------------|-------------|-------------|
| H  | 1.50385200  | -5.46131900 | -1.96643100 |
| H  | 1.98878300  | -3.94634800 | -2.67819800 |
| H  | -3.80498700 | -4.38068800 | -3.91818300 |
| H  | -0.34053600 | -6.75585200 | -3.09676100 |
| H  | -2.76900400 | -6.60625700 | -3.57176100 |
| H  | -0.71752700 | -3.82776300 | -7.60961100 |
| H  | 1.00734200  | -4.10582800 | -7.90794800 |
| H  | 0.29443100  | -4.54581000 | -6.34622300 |
| H  | 5.96297200  | -3.00005800 | -2.85154300 |
| H  | 5.25117100  | -2.87797000 | -1.23855900 |
| H  | 4.57824500  | -4.01290000 | -2.42493000 |
| H  | -2.39126100 | -1.68905900 | -6.04842800 |
| H  | -3.85626800 | -2.60645500 | -5.69413300 |
| H  | -3.82262200 | -0.85159900 | -5.42923100 |
| H  | 3.28269900  | -5.84330300 | -3.64150200 |
| H  | 1.78978400  | -6.60780500 | -4.20661000 |
| H  | 2.31680100  | -5.06788600 | -4.90736300 |
| Ge | -0.65657400 | 1.74068200  | -3.41110300 |
| Ge | 0.65657400  | -1.74068200 | -3.41110300 |
| Sc | 1.65179000  | -0.60880600 | 1.85428100  |
| Sc | -1.65179000 | 0.60880600  | 1.85428100  |
| Sc | 0.00000000  | 0.00000000  | 4.88726300  |
